# Supplementary material for: Evaluation of dentin features in teeth after caries removal by three techniques (chemomechanical, mechanical with a smart bur, and air-abrasion): an in vitro study
Source: PeerJ. 2024 Jul 15;12:e17717. doi: 10.7717/peerj.17717 (PMC11257054; doi:10.7717/peerj.17717)
Supplement: Supplemental Information 1 [file peerj-12-17717-s001.xlsx]

## Sheet: Sheet1
	Grading scores	G1	G2	G3
Smear layer	0	4	4	5
	1	11	9	10
	2	5	6	5
	3	0	1	0
Patency of dentinal tubules	0	3	3	3
	1	9	7	8
	2	7	10	9
	3	1	0	0
Surface irrigularities	0	6	5	4
	1	12	14	16
	2	1	1	0
	3	1	0	0
Intertubular micro poroties	0	4	1	4
	1	8	10	13
	2	8	8	7
	3	0	1	0
Exposed dentinal tubules	0	0	1	1
	1	3	4	9
	2	4	10	7
	3	13	5	3
