# Supplementary material for: Evaluation of dentin features in teeth after caries removal by three techniques (chemomechanical, mechanical with a smart bur, and air-abrasion): an in vitro study
Source: PeerJ. 2024 Jul 15;12:e17717. doi: 10.7717/peerj.17717 (PMC11257054; doi:10.7717/peerj.17717)
Supplement: Supplemental Information 2 [file peerj-12-17717-s002.xlsx]

## Sheet: Sheet1
	Grading scores	G1	G2	G3
Smear layer	0	3	6	6
	1	10	9	10
	2	6	4	3
	3	1	1	1
Patency of dentinal tubules	0	2	4	1
	1	11	8	8
	2	7	7	9
	3	0	1	2
Surface irrigularities	0	5	3	5
	1	13	16	15
	2	1	1	0
	3	1	0	0
Intertubular micro poroties	0	2	0	4
	1	14	16	13
	2	4	3	6
	3	0	1	1
Exposed dentinal tubules	0	0	1	1
	1	4	3	8
	2	10	9	6
	3	6	7	5
